# Supplementary material for: An alternative solution for α-linolenic acid supplements: in vitro digestive properties of silkworm pupae oil in a pH-stat system
Source: Royal Society of Chemistry journal article supplement (doi:10.1039/d0fo03469j), 2021-01-01
Supplement: d0fo03469j1.pdf [file d0fo03469j1.pdf]

## Supplementary materials for

### **An alternative solution for $\alpha$ -linolenic acid supplements: *In vitro* digestive properties of silkworm pupae oil in a pH-stat system**

Cheng-Hai Yan <sup>a</sup>, Xiao-Meng Xun <sup>a</sup>, Jiao Wang <sup>a</sup>, Jin-Zheng Wang <sup>a</sup>, Shuai You <sup>a,b</sup>, Fu-An Wu <sup>a</sup>,  
<sup>b</sup>, Jun Wang <sup>a,b,\*</sup>

<sup>a</sup> *Jiangsu Key Laboratory of Sericultural Biology and Biotechnology, School of Biotechnology, Jiangsu University of Science and Technology, Zhenjiang, Jiangsu 212018, China;*

<sup>b</sup> *Key Laboratory of Silkworm and Mulberry Genetic Improvement, Ministry of Agricultural and Rural Affairs, Sericultural Research Institute, Chinese Academy of Agricultural Sciences, Zhenjiang, Jiangsu 212018, China.*

To whom all correspondence should be addressed.

\* Corresponding author. *Phone:* +86-511-85635867, *Fax:* +86-511-85620901.

*E-mail:* [wangjun@just.edu.cn](mailto:wangjun@just.edu.cn) (Prof. Dr. Jun Wang)

**Table S1. Composition of saliva juice, gastric juice, duodenal juice and bile juice for simulated *in vitro* digestion model.**

| Simulated solution              | Saliva juice<br>(pH 6.8±0.2)                   | Gastric juice<br>(pH 1.30±0.02)               | Duodenal juice<br>(pH 8.1±0.2)             | Bile juice<br>(pH 8.2±0.2)         |
|---------------------------------|------------------------------------------------|-----------------------------------------------|--------------------------------------------|------------------------------------|
| Inorganic solution              | 10 mL 89.6g/L KCl                              | 15.7 mL 175.3g/L NaCl                         | 40 mL 175.3g/L NaCl                        | 30 mL 175.3g/L NaCl                |
|                                 | 10 mL 20g/L KSCN                               | 3 mL 88.8g/L NaH <sub>2</sub> PO <sub>4</sub> | 40 mL 84.7g/L NaHCO <sub>3</sub>           | 68.3 mL 84.7g/L NaHCO <sub>3</sub> |
|                                 | 10 mL 88.8g/L NaH <sub>2</sub> PO <sub>4</sub> | 9.2 mL 89.6g/L KCl                            | 10 mL 8g/L KH <sub>2</sub> PO <sub>4</sub> | 4.2 mL 89.6g/L KCl                 |
|                                 | 1.7 mL 175.3g/L NaCl                           | 18 mL 22.2g/L CaCl <sub>2</sub>               | 6.3 mL 89.6g/L KCl                         | 150 µL 37%g/g HCl                  |
|                                 | 57g/L Na <sub>2</sub> SO <sub>4</sub>          | 10 mL 30.6g/L NH <sub>4</sub> Cl              | 10 mL 5g/L MgCl <sub>2</sub>               |                                    |
|                                 | 10 mL 84.7g/L NaHCO <sub>3</sub>               | 6.5 mL 37%g/g HCl                             | 180 µL 37%g/g HCl                          |                                    |
| Organic solution                | 8mL 25g/L Urea                                 | 10 mL 65g/L Glucose                           | 4mL 25g/L Urea                             | 10 mL 25g/L Urea                   |
|                                 |                                                | 10 mL 2g/L Glucuronic acid                    |                                            |                                    |
|                                 |                                                | 3.4 mL 25g/L Urea                             |                                            |                                    |
|                                 |                                                | 1 mL 33g/L Glucosamine Hydrochloride          |                                            |                                    |
| Add to mixture                  | 290 mg α-amylase                               | 1 g BSA                                       | 9 mL 22.2g/L CaCl <sub>2</sub>             | 10 mL 22.2g/L CaCl <sub>2</sub>    |
| inorganic and organic solutions | 15 mg Uric acid                                | 2.5 g Pepsin                                  | 1 g BSA                                    | 1.8 g BSA                          |
|                                 | 25mg Mucin                                     | 3g Mucin                                      |                                            | 30 g Bile extract                  |

The inorganic and organic solutions were mixed and filled up to 500 mL with distilled water and then other compounds were dissolved. Finally, pH value of each juice was adjusted to their own each value.
